# Supplementary material for: Electrospun Scaffolds of Polylactic Acid, Collagen, and Amorphous Calcium Phosphate for Bone Repair
Source: MDPI journal article supplement (doi:10.3390/pharmaceutics15112529), 2023-10-25
Supplement: s1 [file s1]

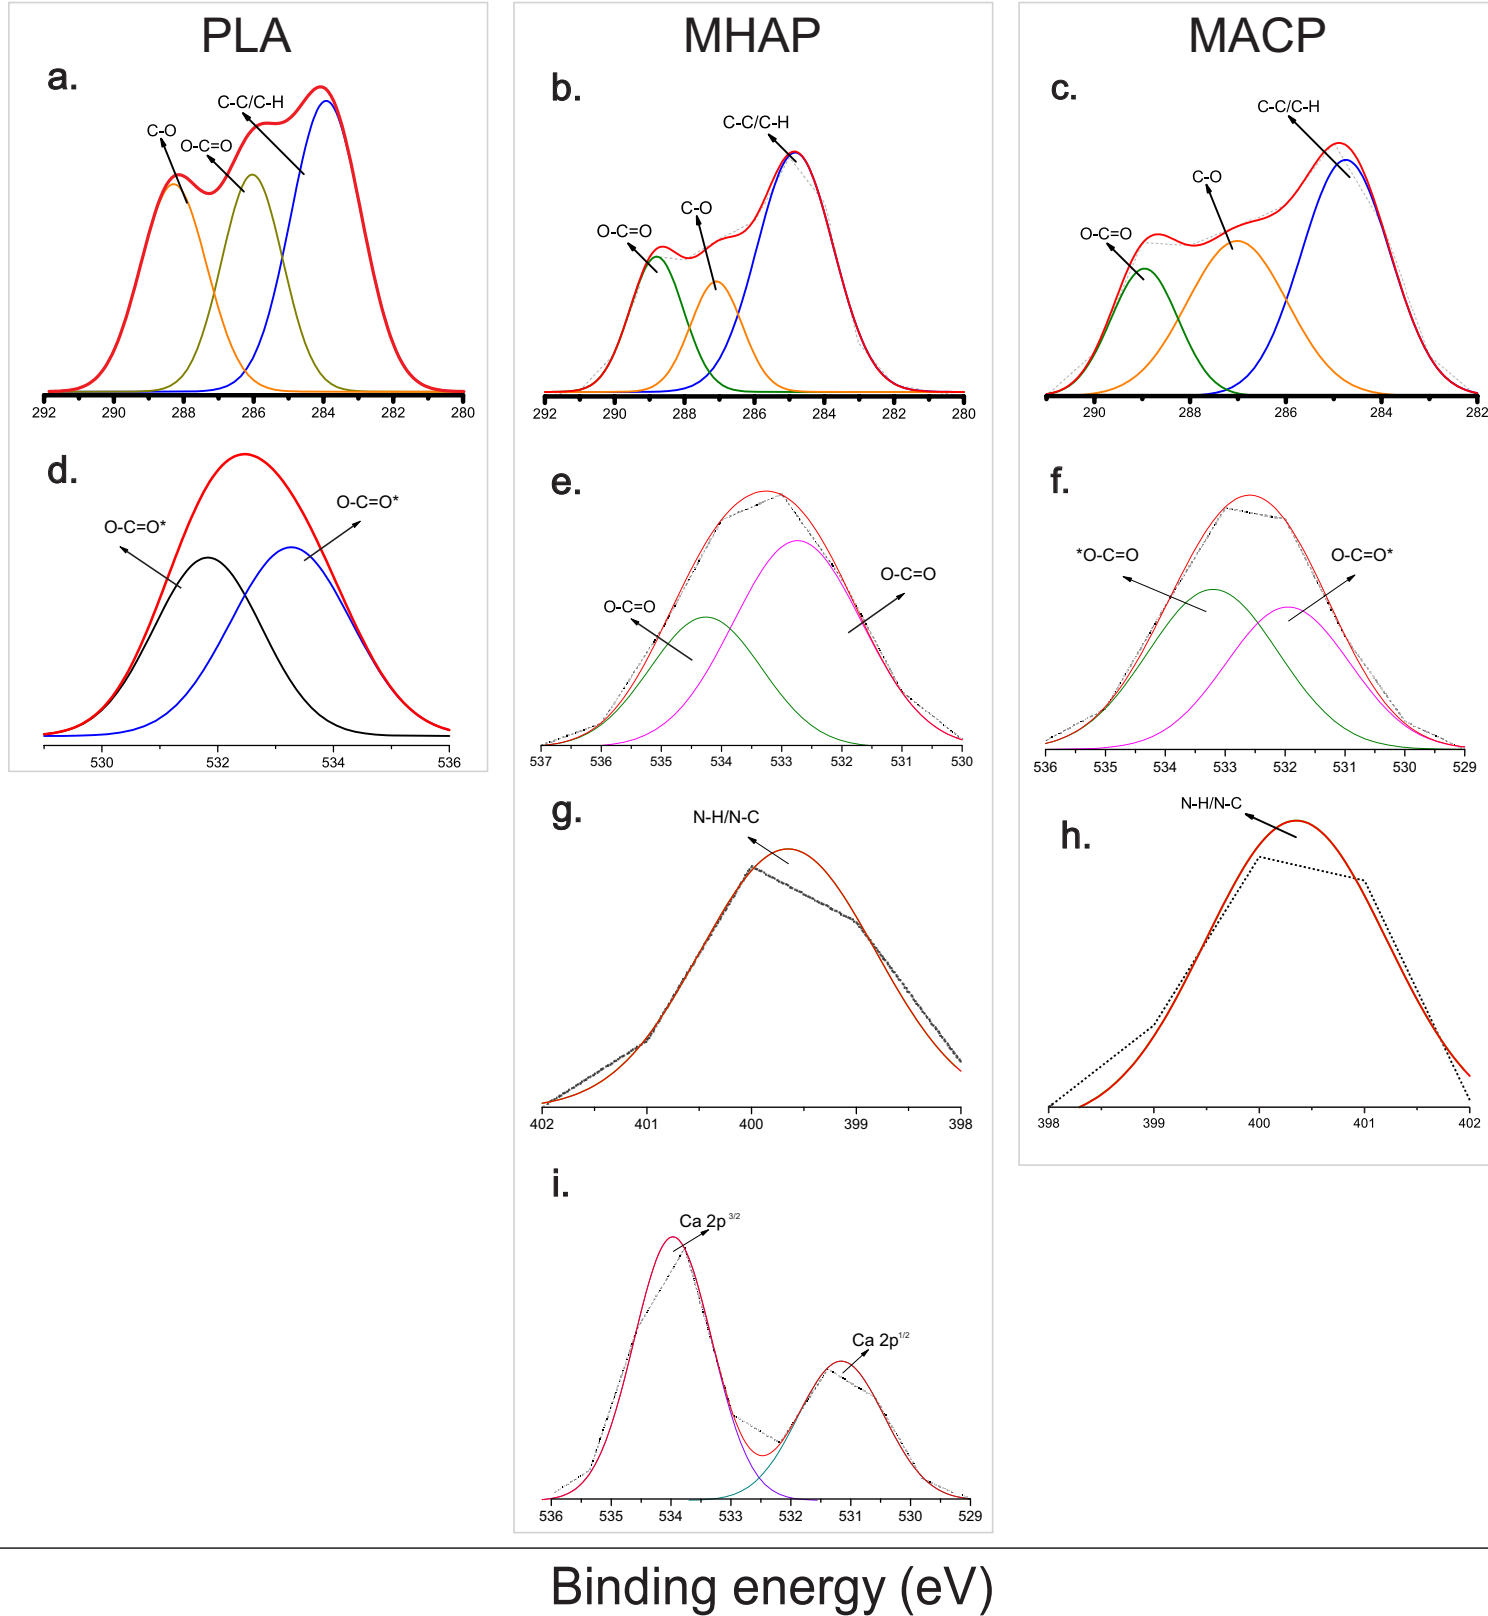

**Figure S1:** Deconvolution of the C1s, O1s, N1s and Ca2p signals of PLA (a and d), MHAP (b, e, g and i) and MACP (c, f and h) electrospun scaffolds.
